# Supplementary material for: Longitudinal evaluation of cerebral and spinal cord damage in Amyotrophic Lateral Sclerosis
Source: PubMed Central journal article supplement — Neuroimage Clin. 2017 Jan 24;14:269–76. doi: 10.1016/j.nicl.2017.01.024 (PMC5294732; doi:10.1016/j.nicl.2017.01.024), 2017-01-24
Supplement: mmc1.pdf [file mmc1.pdf]

**Supplemental table 1.** Regions that presented significant cortical thinning in patients with ALS compared to healthy controls (FDR-corrected p-values<0.05).

| Anatomical structures        | ALS patients<br>(mean $\pm$ SD, mm) | Healthy controls<br>(mean $\pm$ SD, mm) |
|------------------------------|-------------------------------------|-----------------------------------------|
| Left hemisphere              |                                     |                                         |
| Paracentral cortex           | 2.14 $\pm$ 0.16                     | 2.26 $\pm$ 0.15                         |
| Precentral cortex            | 2.23 $\pm$ 0.18                     | 2.38 $\pm$ 0.13                         |
| Superior temporal cortex     | 2.51 $\pm$ 0.20                     | 2.66 $\pm$ 0.17                         |
| Caudal middle frontal cortex | 2.21 $\pm$ 0.13                     | 2.27 $\pm$ 0.14                         |
| Frontal Pole cortex          | 2.55 $\pm$ 0.21                     | 2.64 $\pm$ 0.29                         |
| Fusiform cortex              | 2.60 $\pm$ 0.15                     | 2.66 $\pm$ 0.12                         |
| Inferior temporal cortex     | 2.60 $\pm$ 0.16                     | 2.67 $\pm$ 0.15                         |
| Middle temporal cortex       | 2.62 $\pm$ 0.18                     | 2.70 $\pm$ 0.13                         |
| Parahippocampal cortex       | 2.67 $\pm$ 0.33                     | 2.79 $\pm$ 0.34                         |
| Pars opercularis cortex      | 2.34 $\pm$ 0.16                     | 2.41 $\pm$ 0.15                         |
| Pars orbitalis cortex        | 2.49 $\pm$ 0.22                     | 2,58 $\pm$ 0.25                         |

|                                   |              |             |
|-----------------------------------|--------------|-------------|
| Posterior cingulate cortex        | 2.41 ± 0.18  | 2.49 ± 0.16 |
| Rostral anterior cingulate cortex | 2.756 ± 0.24 | 2.85 ± 0.21 |
| Rostral middle frontal cortex     | 2.10 ± 0.12  | 2.14 ± 0.11 |
| Supramarginal cortex              | 2.29 ± 0.12  | 2.34 ± 0.13 |
| Temporal pole cortex              | 3.51 ± 0.38  | 3.70 ± 0.31 |
| Transverse temporal cortex        | 2.07 ± 0.21  | 2.18 ± 0.24 |
| Right hemisphere                  |              |             |
| Inferior temporal cortex          | 2.64 ± 0.18  | 2.74 ± 0.13 |
| Middle temporal cortex            | 2.69 ± 0.16  | 2.81 ± 0.14 |
| Precentral cortex                 | 2.21 ± 0.17  | 2.35 ± 0.13 |
| Superior temporal cortex          | 2.59 ± 0.20  | 2.72 ± 0.16 |
| Bankssts cortex                   | 2.37 ± 0.16  | 2.49 ± 0.14 |
| Caudal middle frontal cortex      | 2.23 ± 0.13  | 2.30 ± 0.13 |

|                               |             |             |
|-------------------------------|-------------|-------------|
| Fusiform cortex               | 2.59 ± 0.17 | 2.67 ± 0.12 |
| Lateral orbitofrontal cortex  | 2.44 ± 0.15 | 2.51 ± 0.15 |
| Medial orbitofrontal cortex   | 2.31 ± 0.16 | 2.38 ± 0.14 |
| Paracentral cortex            | 2.14 ± 0.14 | 2.23 ± 0.14 |
| Pars opercularis cortex       | 2.34 ± 0.17 | 2.41 ± 0.14 |
| Pars triangularis cortex      | 2.20 ± 0.14 | 2.28 ± 0.16 |
| Rostral middle frontal cortex | 2.10 ± 0.11 | 2.16 ± 0.12 |
| Superior frontal cortex       | 2.42 ± 0.14 | 2.49 ± 0.14 |
| Supramarginal cortex          | 2.28 ± 0.14 | 2.36 ± 0.15 |
| Temporal pole cortex          | 3.61 ± 0.43 | 3.79 ± 0.32 |
| Transverse temporal cortex    | 2.13 ± 0.25 | 2.25 ± 0.20 |
